# Supplementary material for: Comparative Genomics of Recent Shiga Toxin-Producing Escherichia coli O104:H4: Short-Term Evolution of an Emerging Pathogen
Source: PubMed Central journal article supplement — mBio. 2013 Jan 22;4(1):e00452-12. doi: 10.1128/mBio.00452-12 (PMC3551546; doi:10.1128/mbio.00452-12), 2013-01-22
Supplement: mbo001131418so4.pdf [file mbo001131418so4.pdf]

**A.**

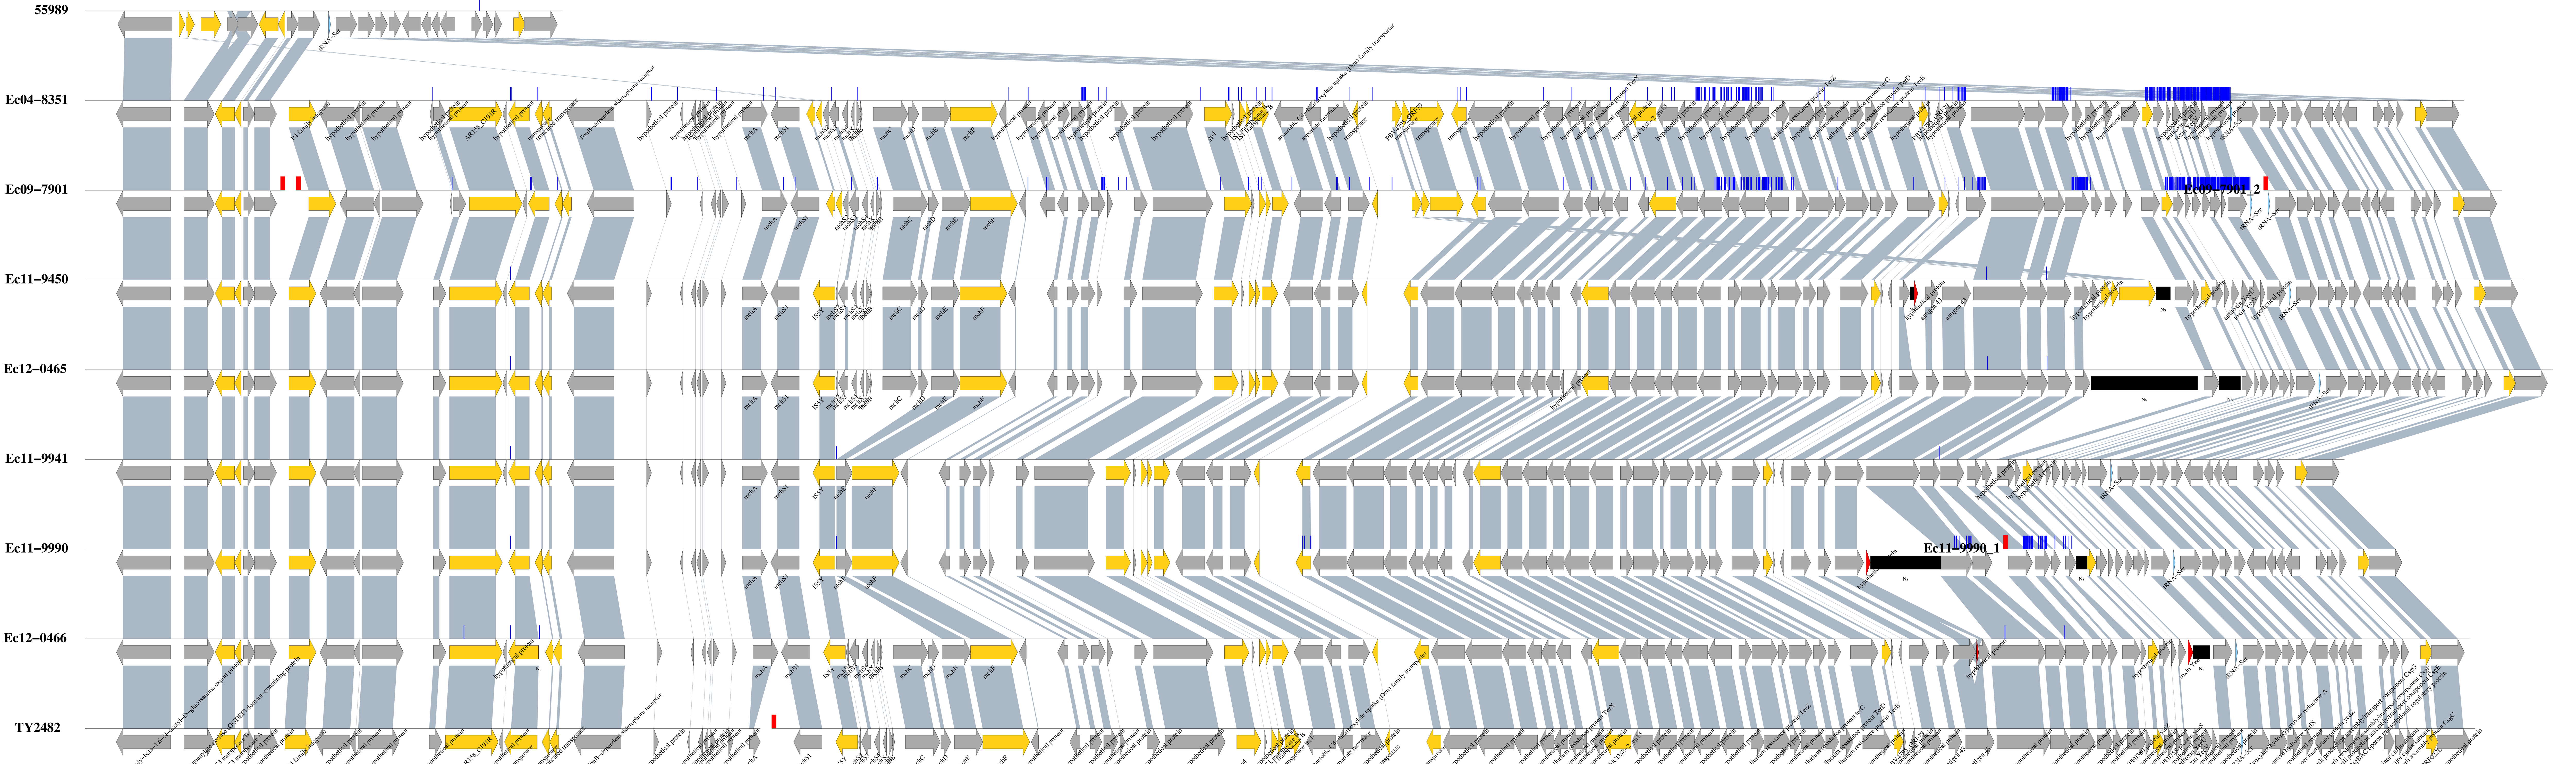

## Genomic Island 1

3.

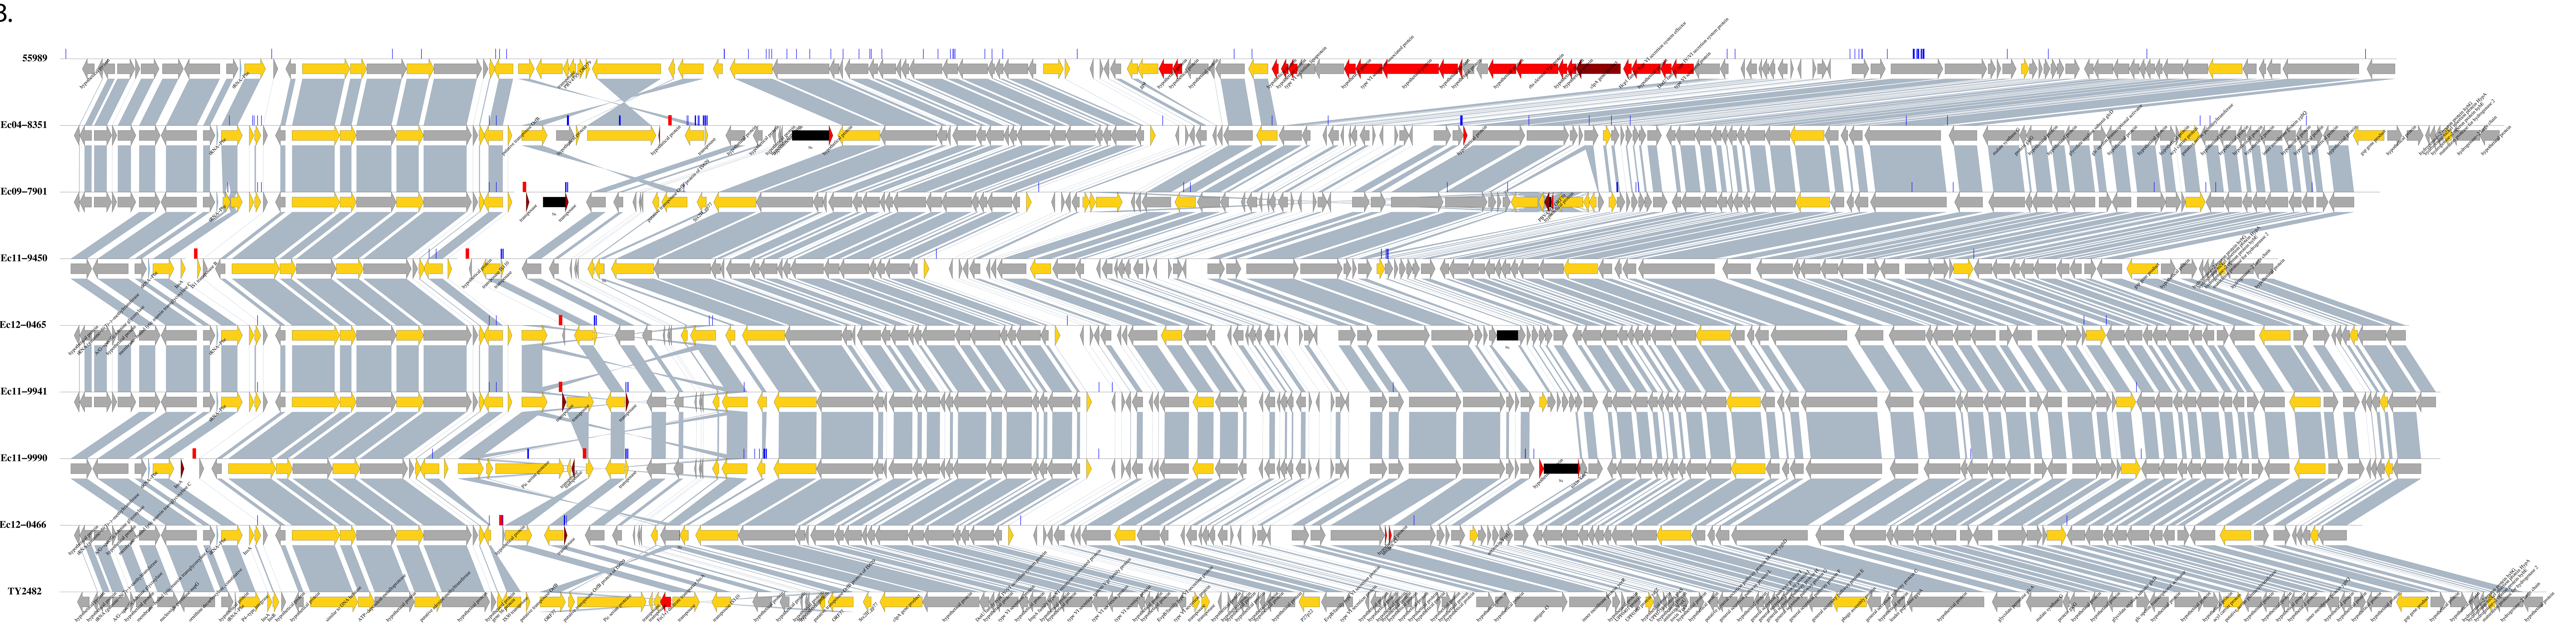

# Genomic Island 2

C.

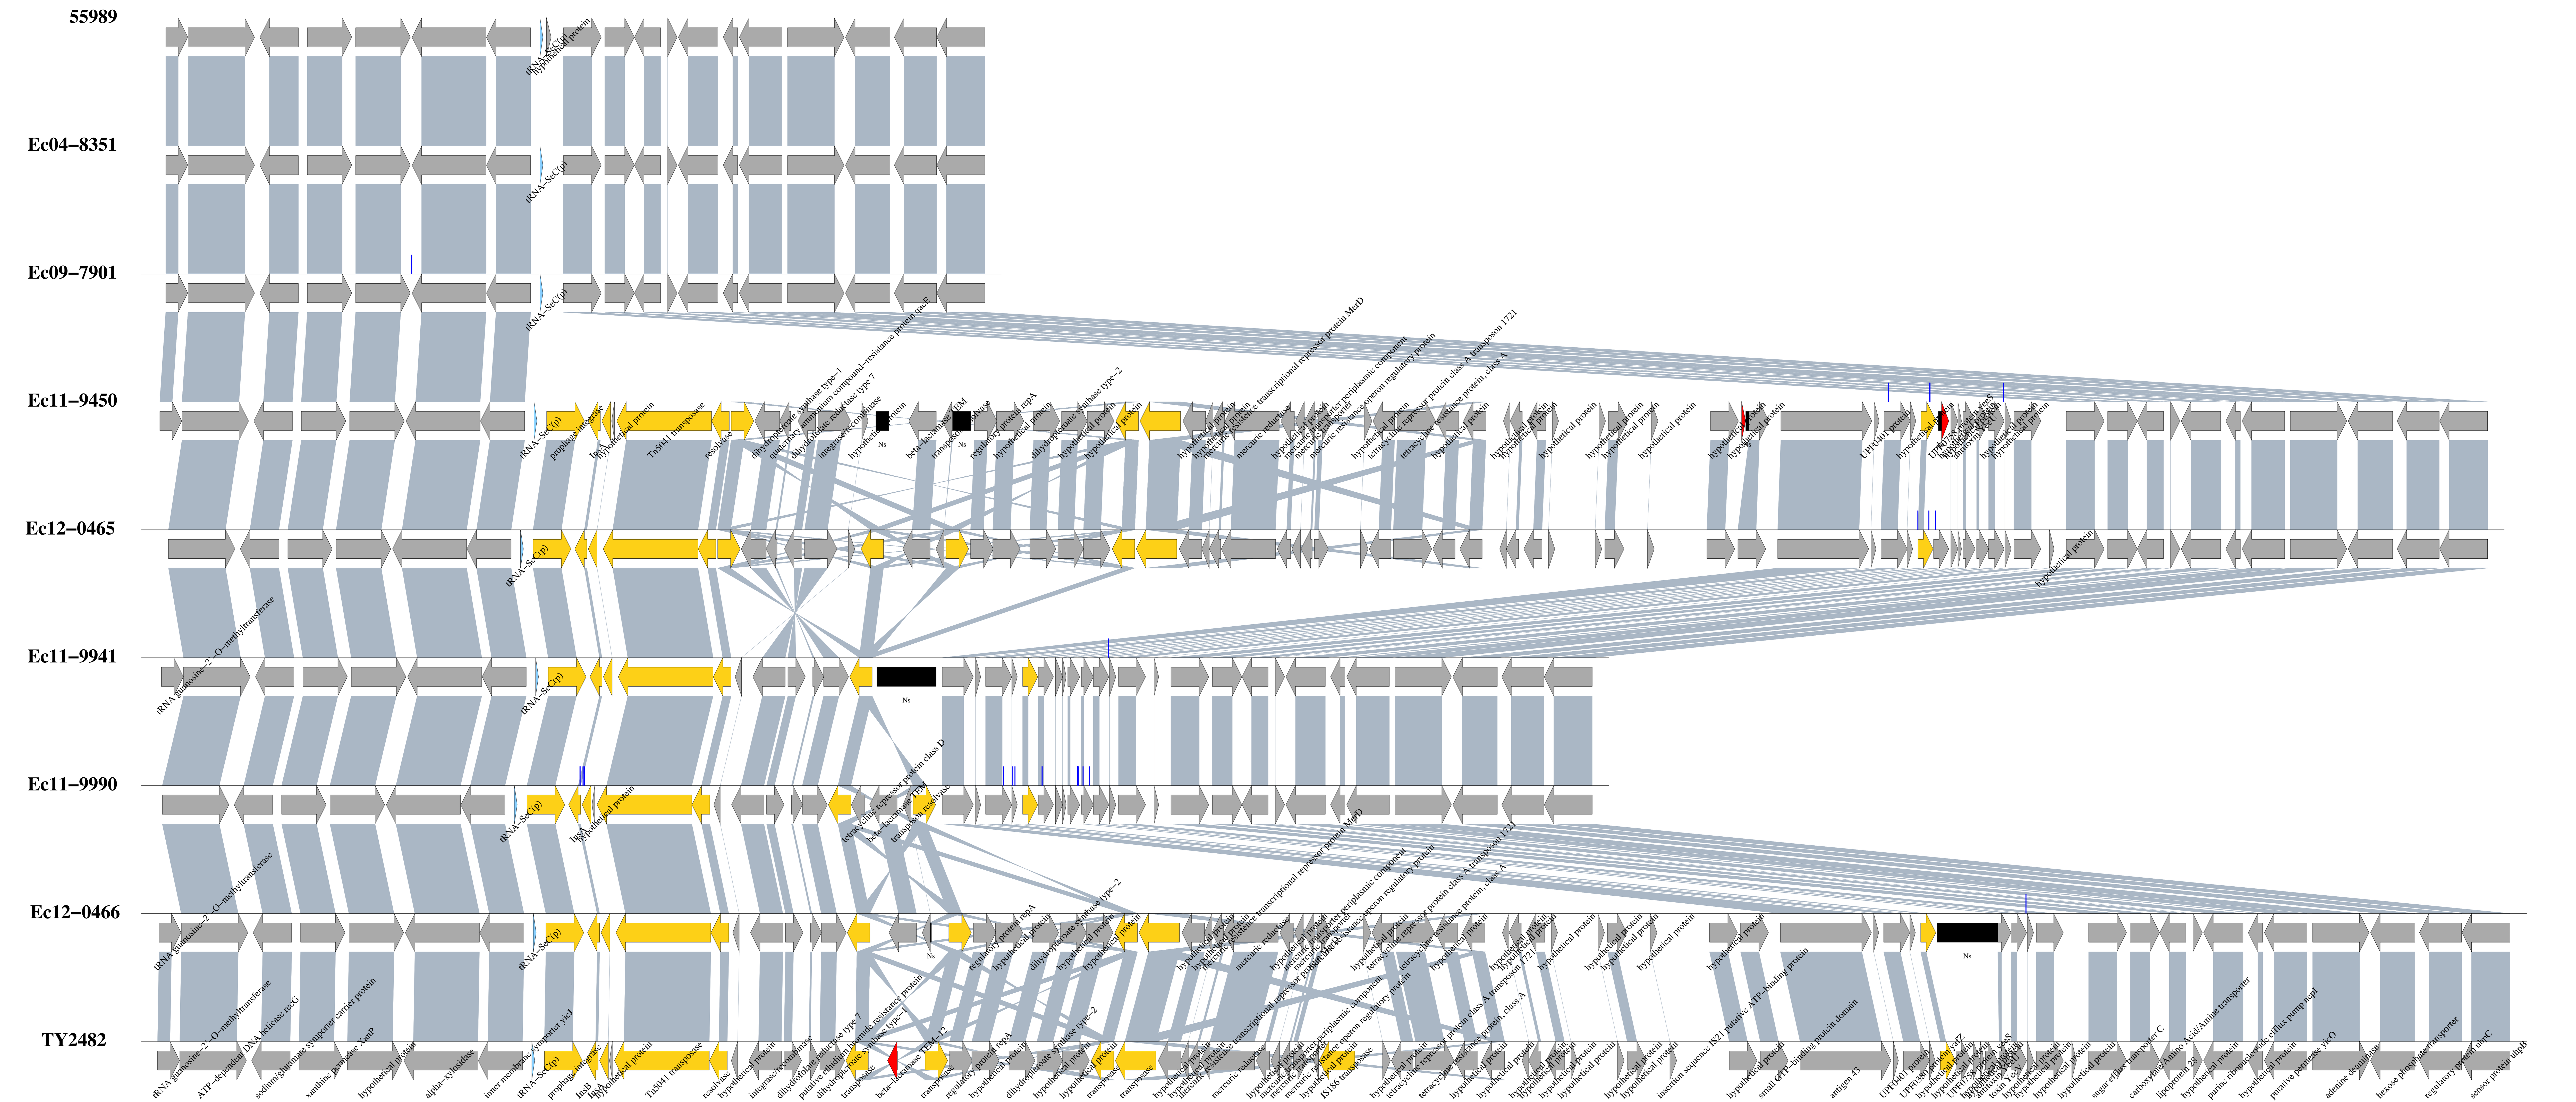

## Genomic Island 3

D.

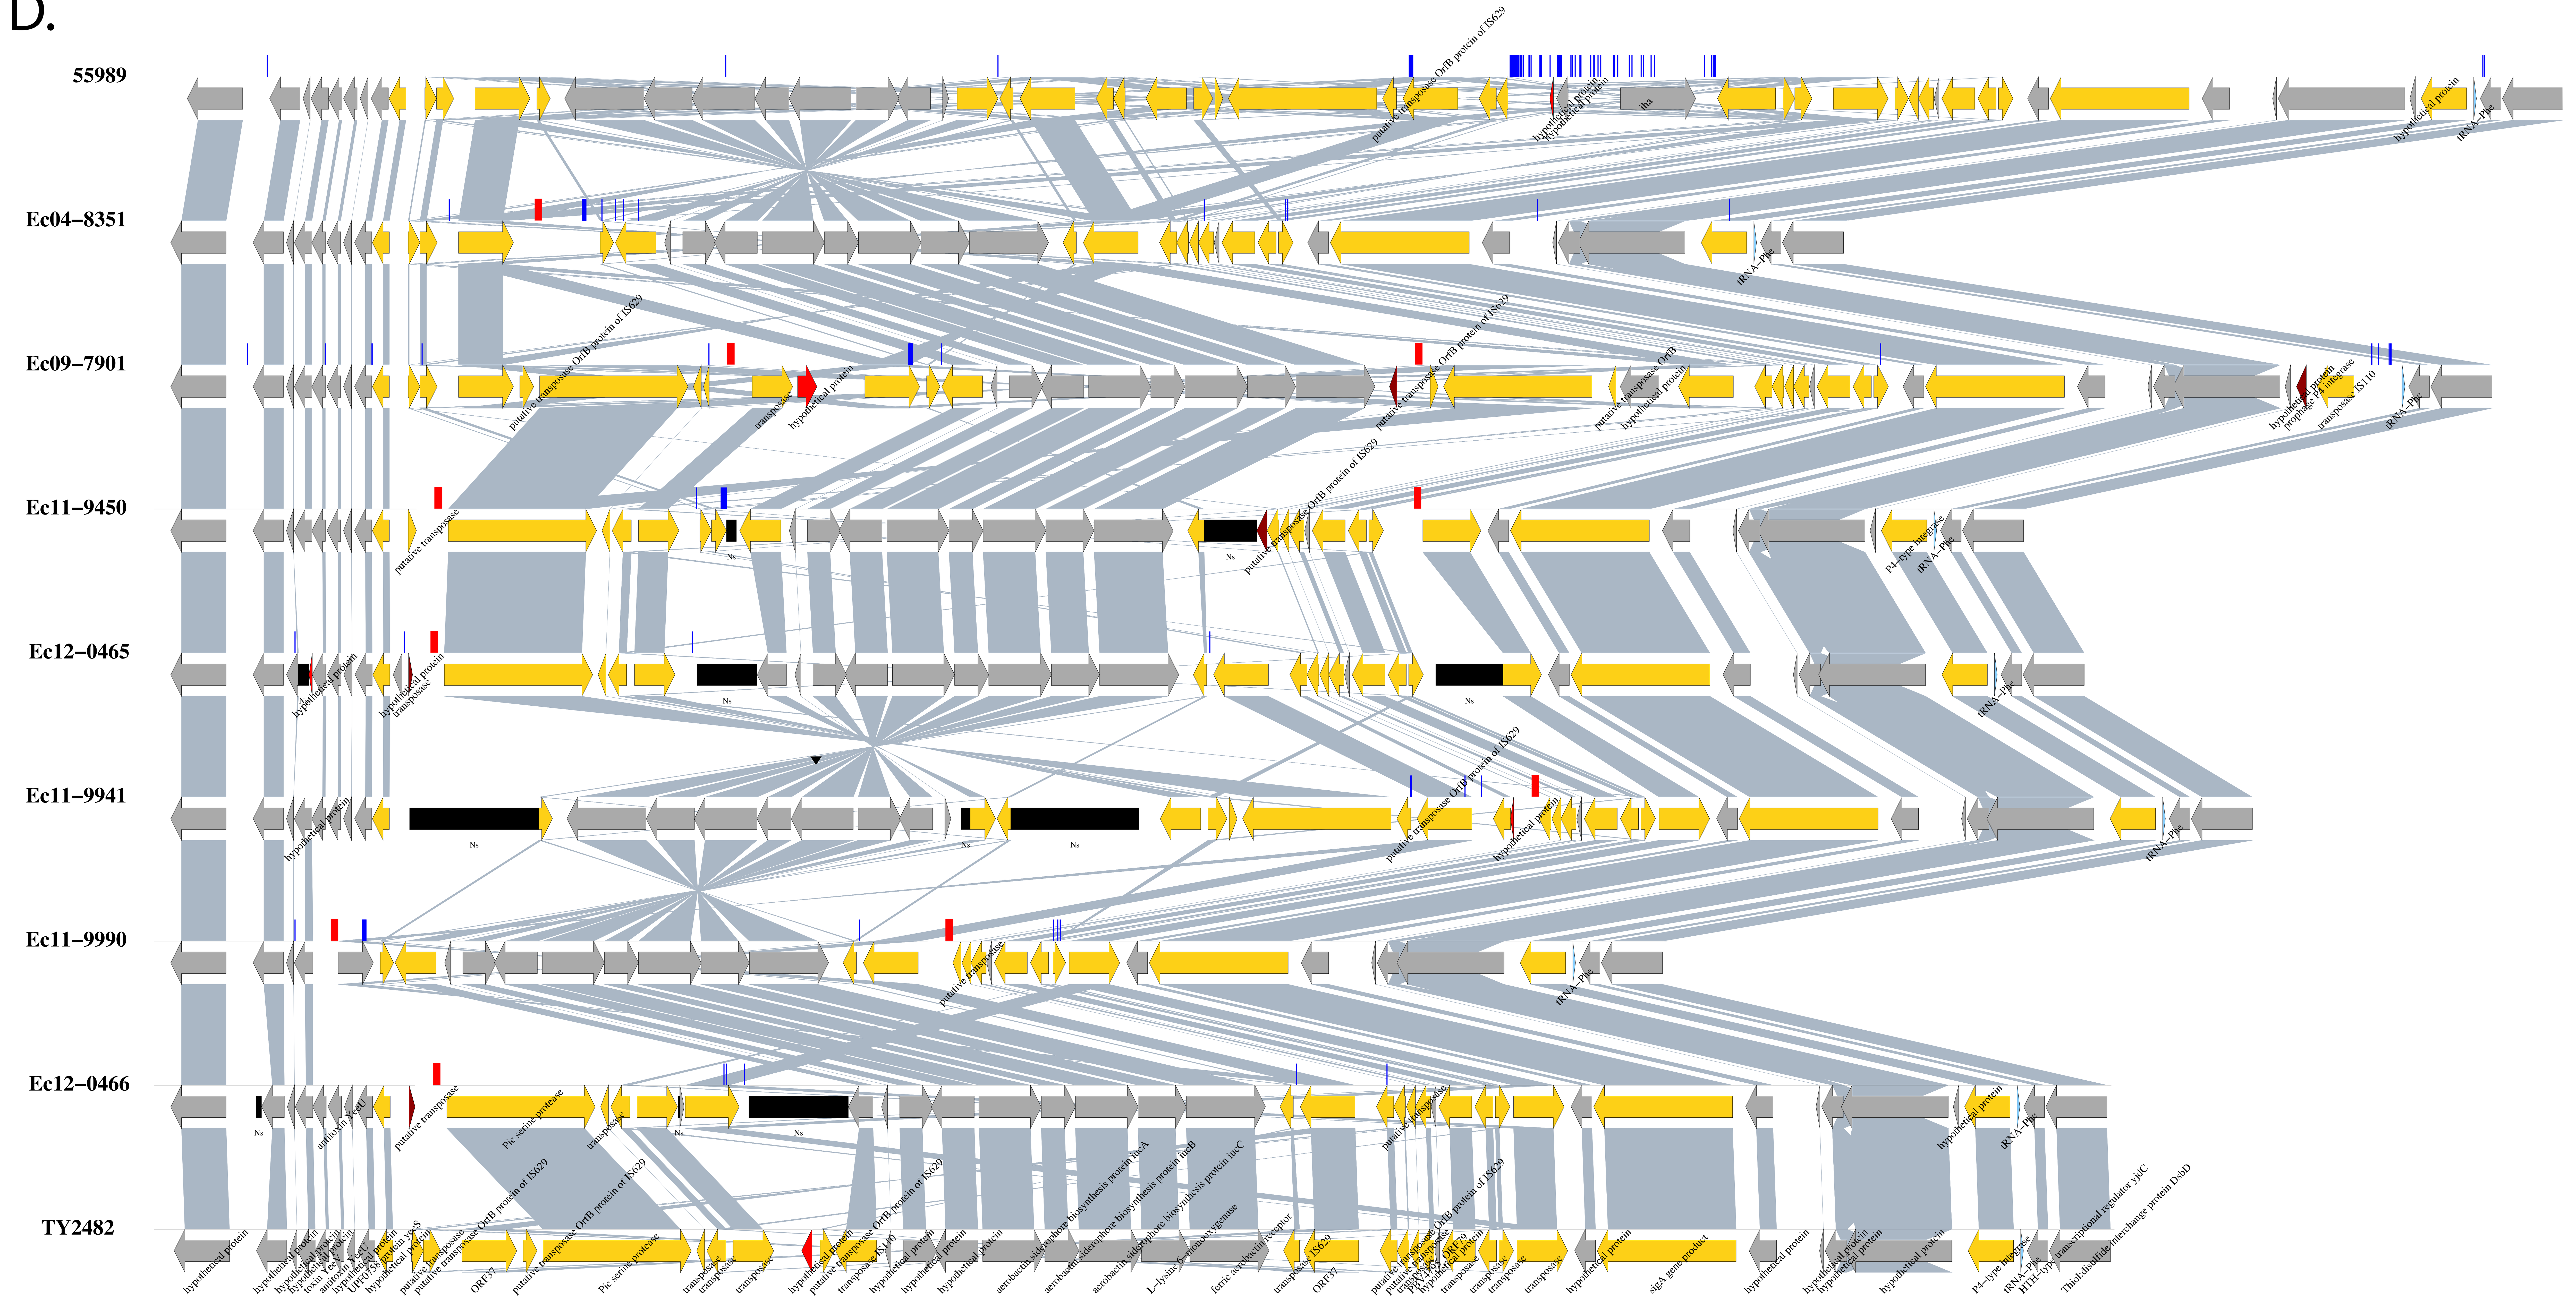

## Genomic Island 4

## Genomic Island 5

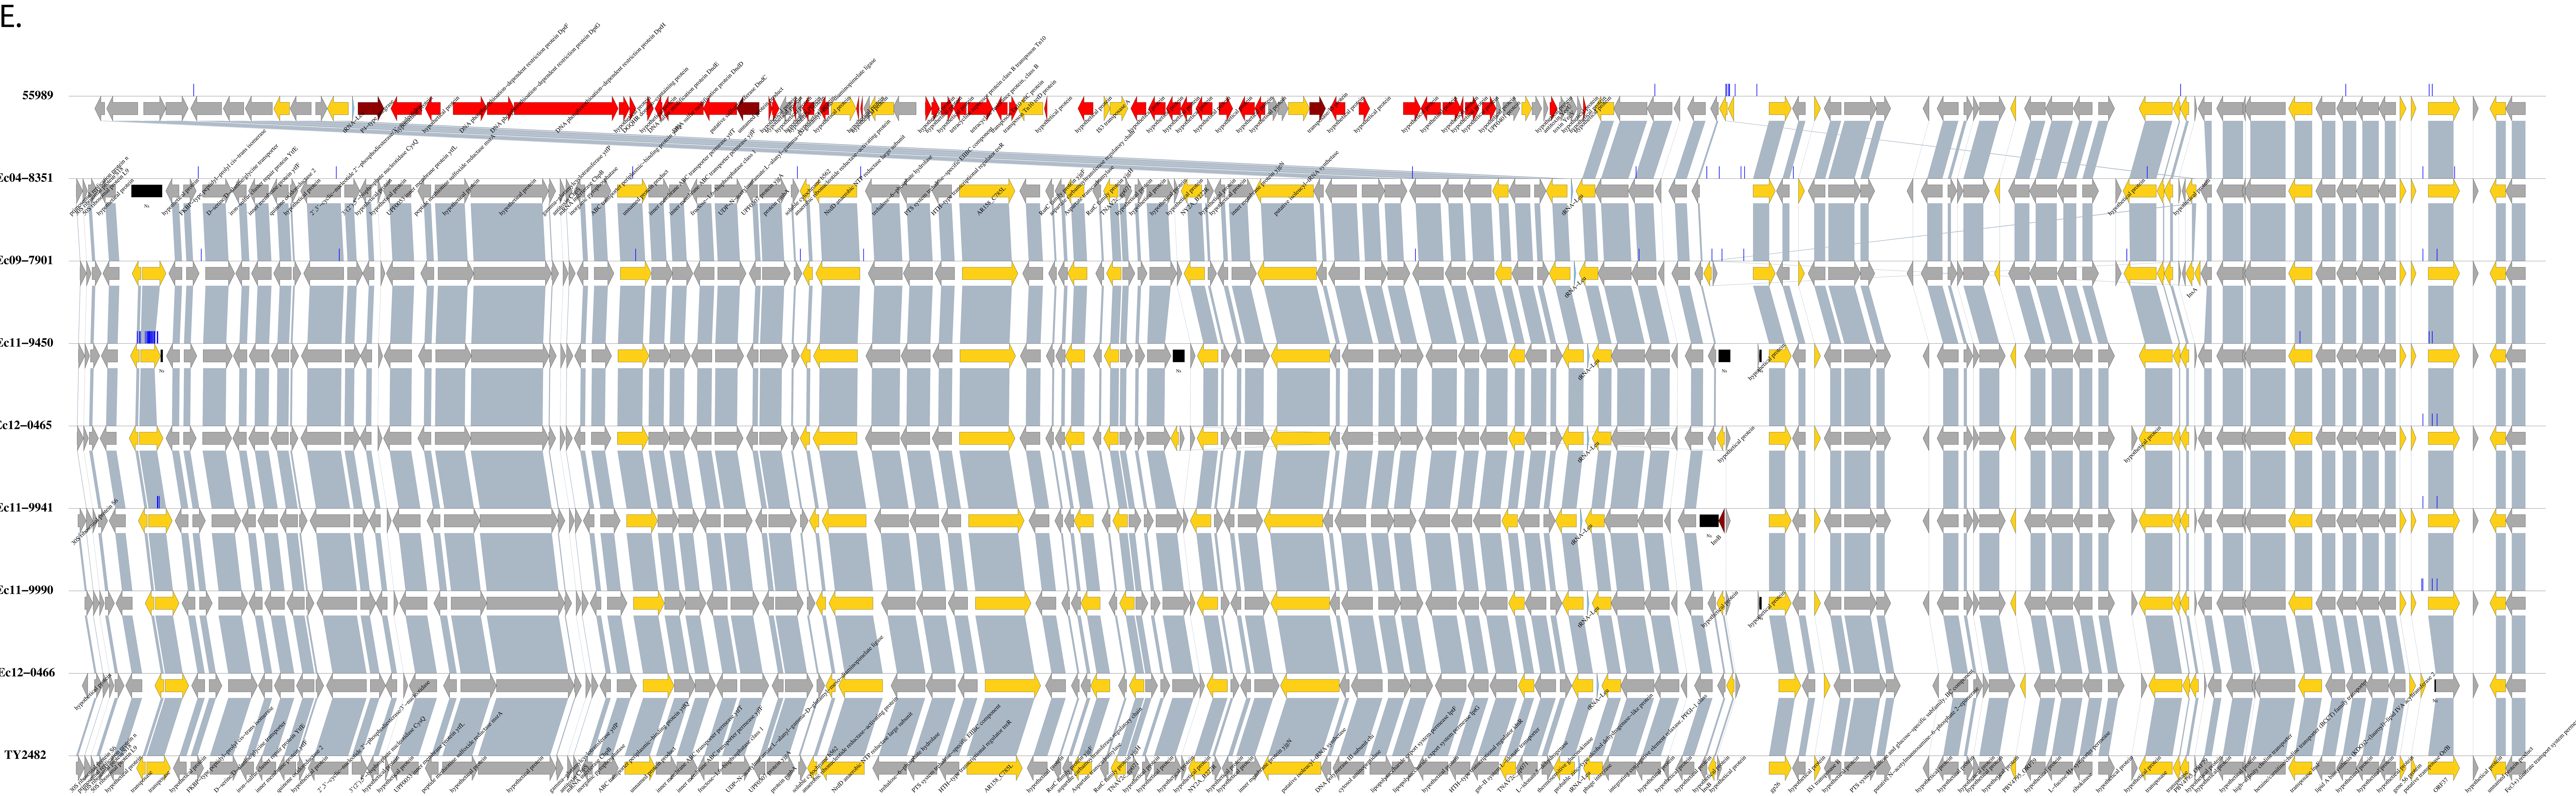

## Genomic Island 6

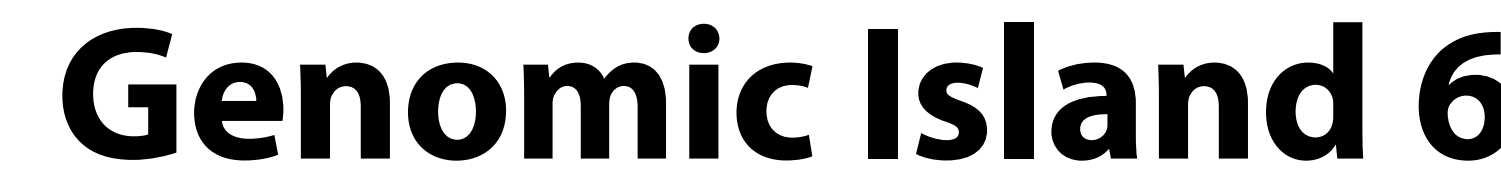

G.

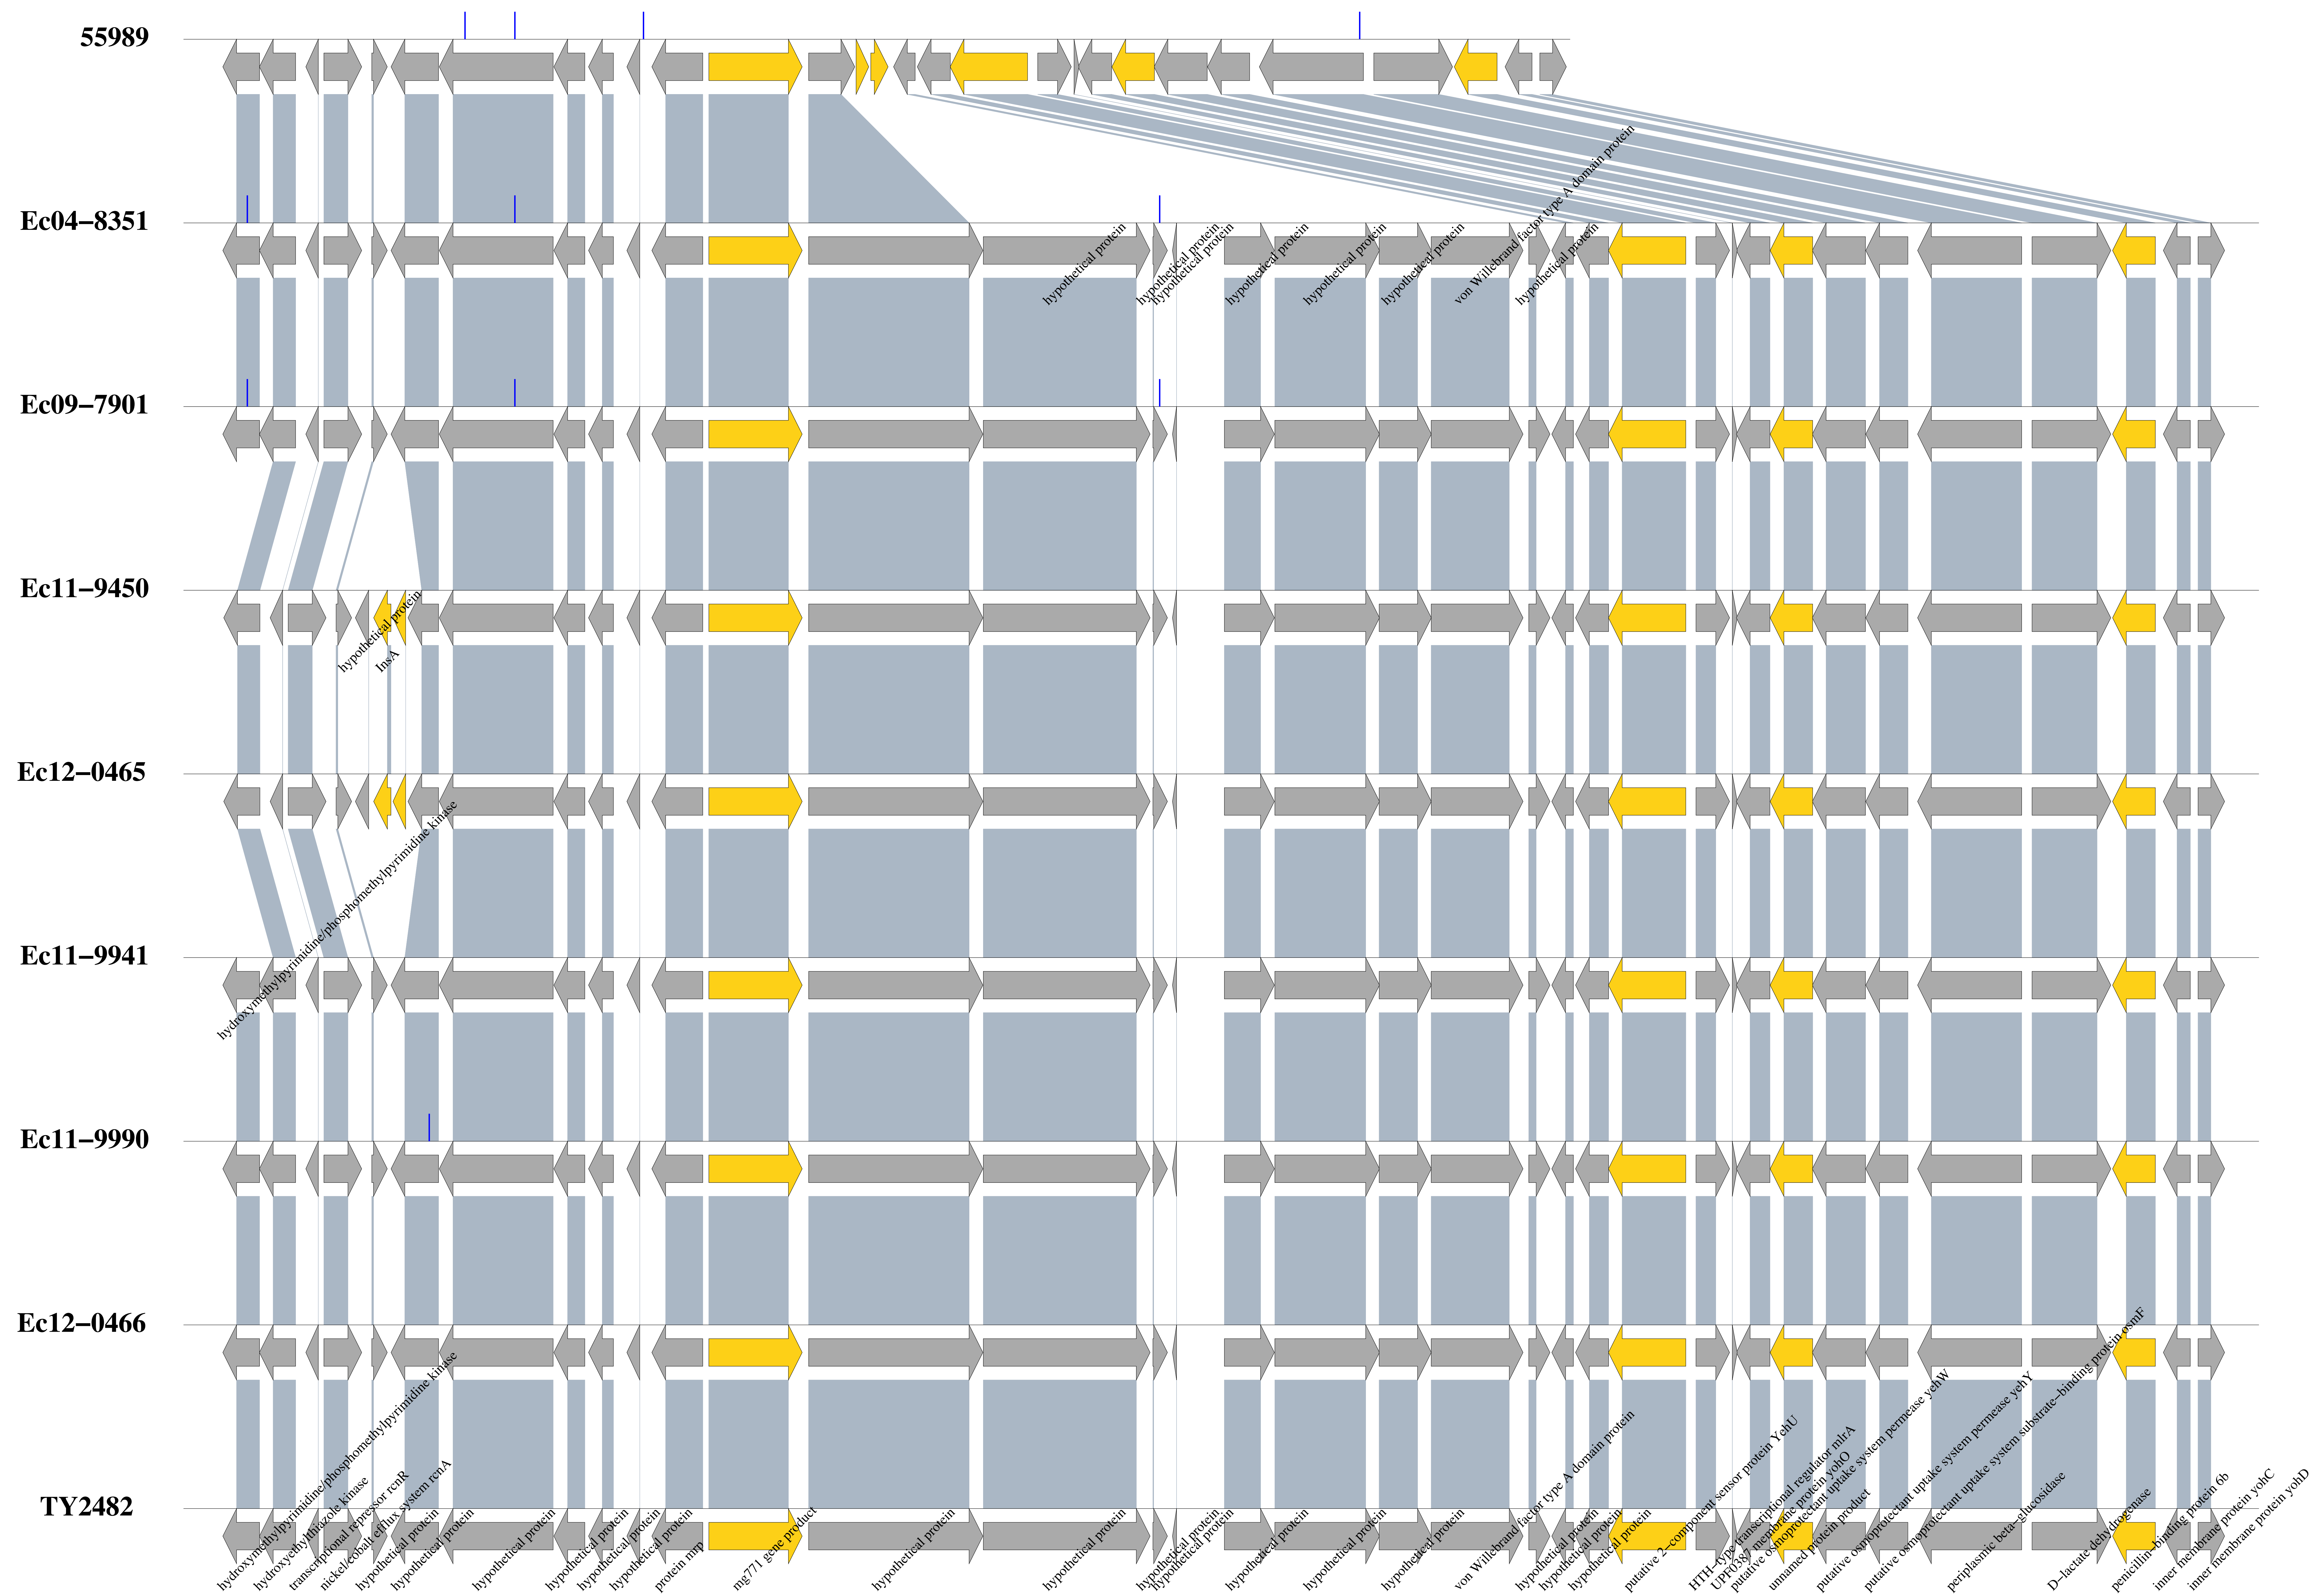

## Deletion
