# Supplementary figures and images for: Comparative Genomics of Recent Shiga Toxin-Producing Escherichia coli O104:H4: Short-Term Evolution of an Emerging Pathogen
Source: PubMed Central journal article supplement — mBio. 2013 Jan 22;4(1):e00452-12. doi: 10.1128/mBio.00452-12 (PMC3551546; doi:10.1128/mbio.00452-12), 2013-01-22

TY2482

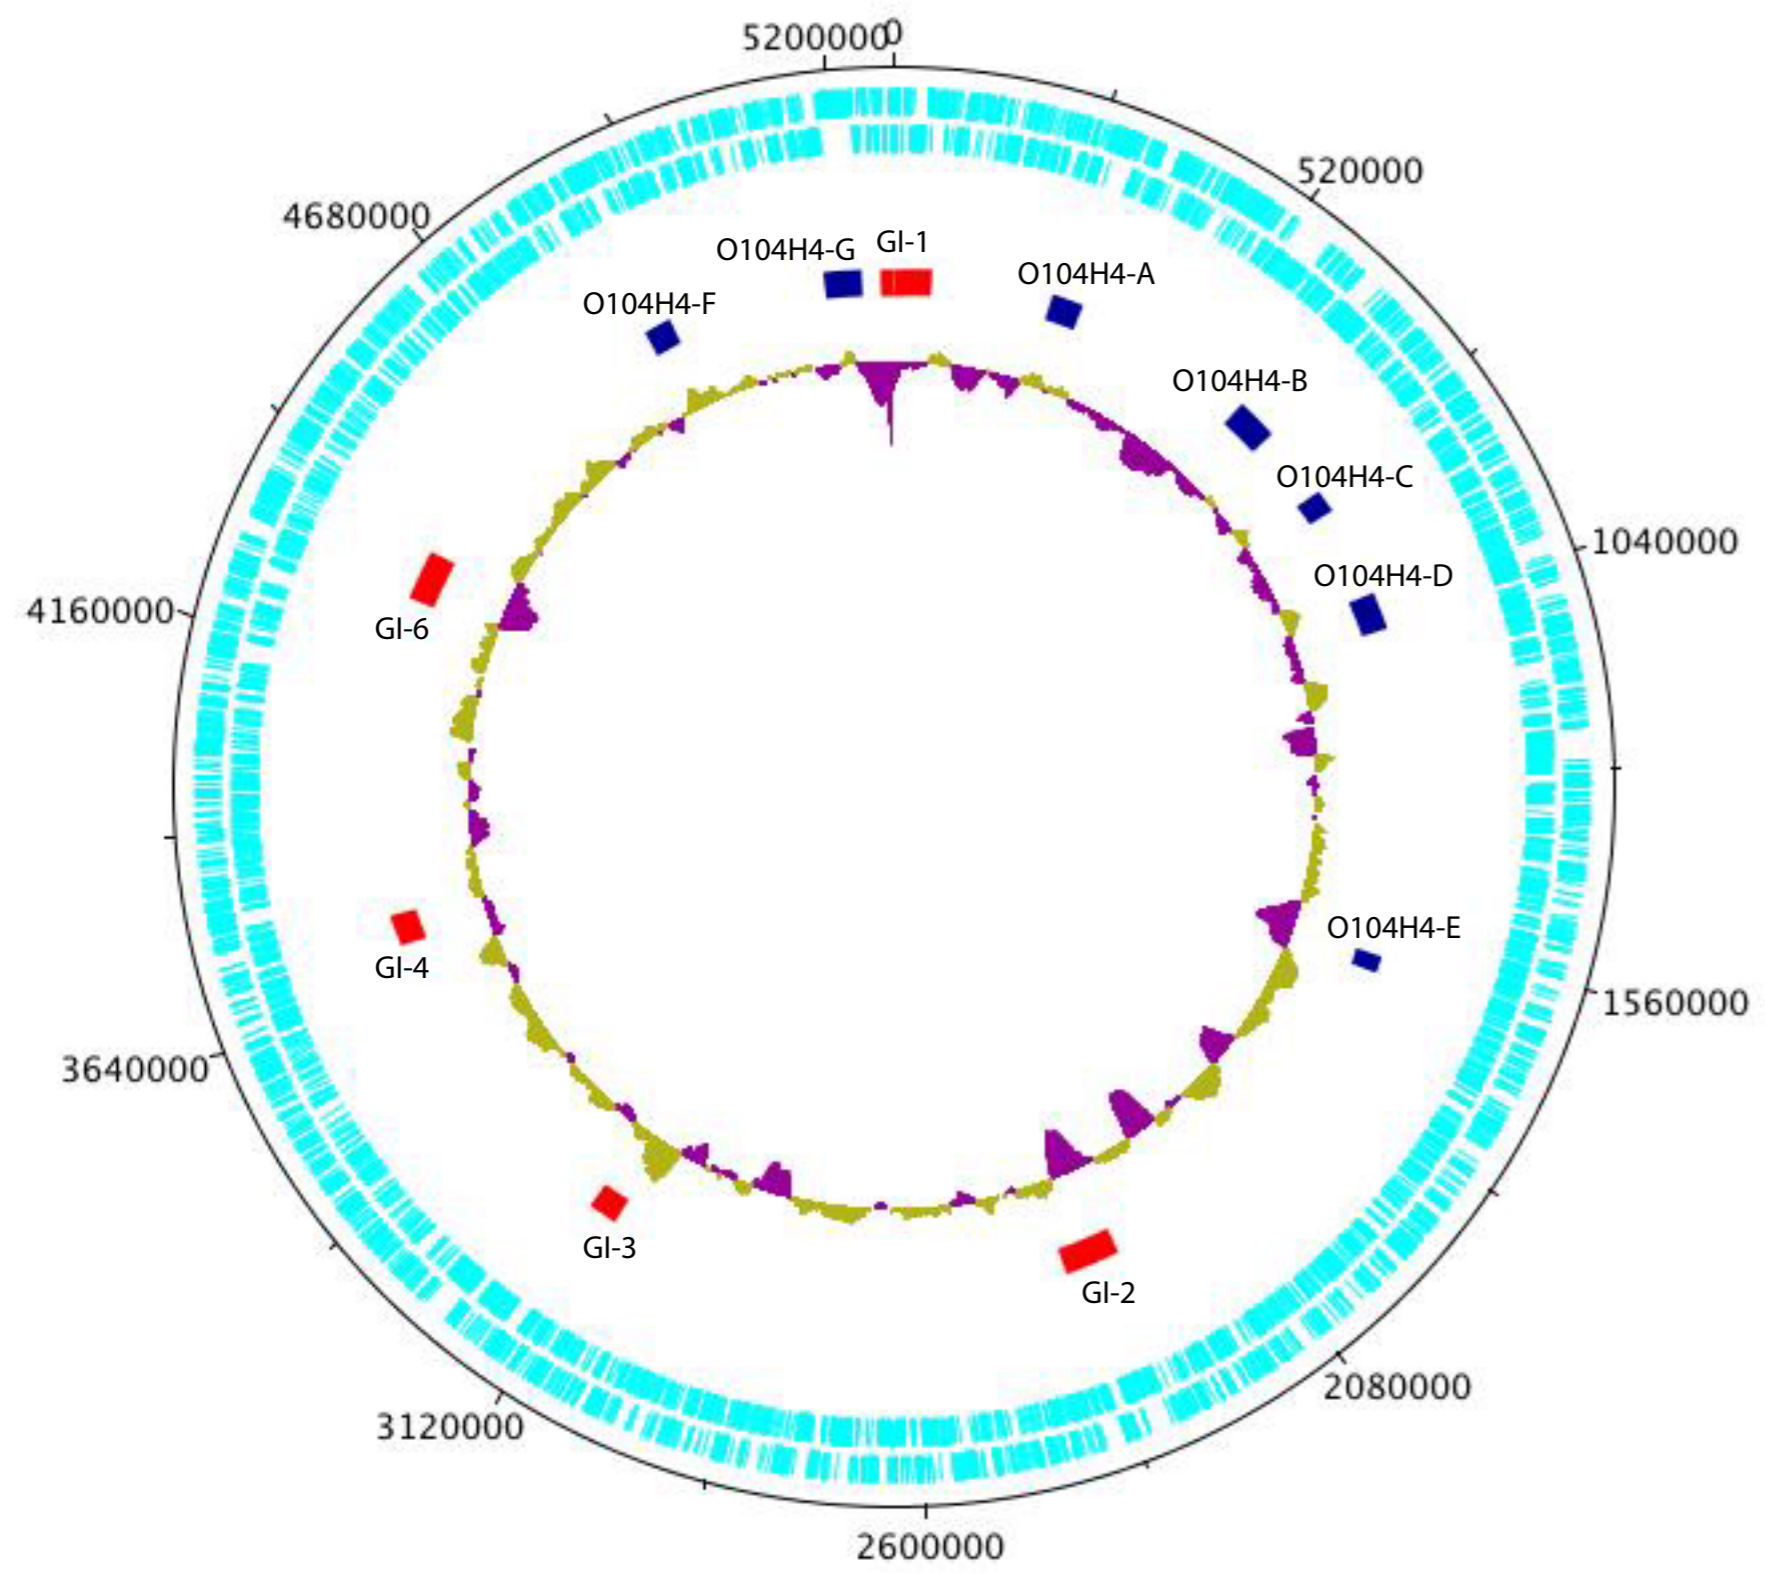

55989

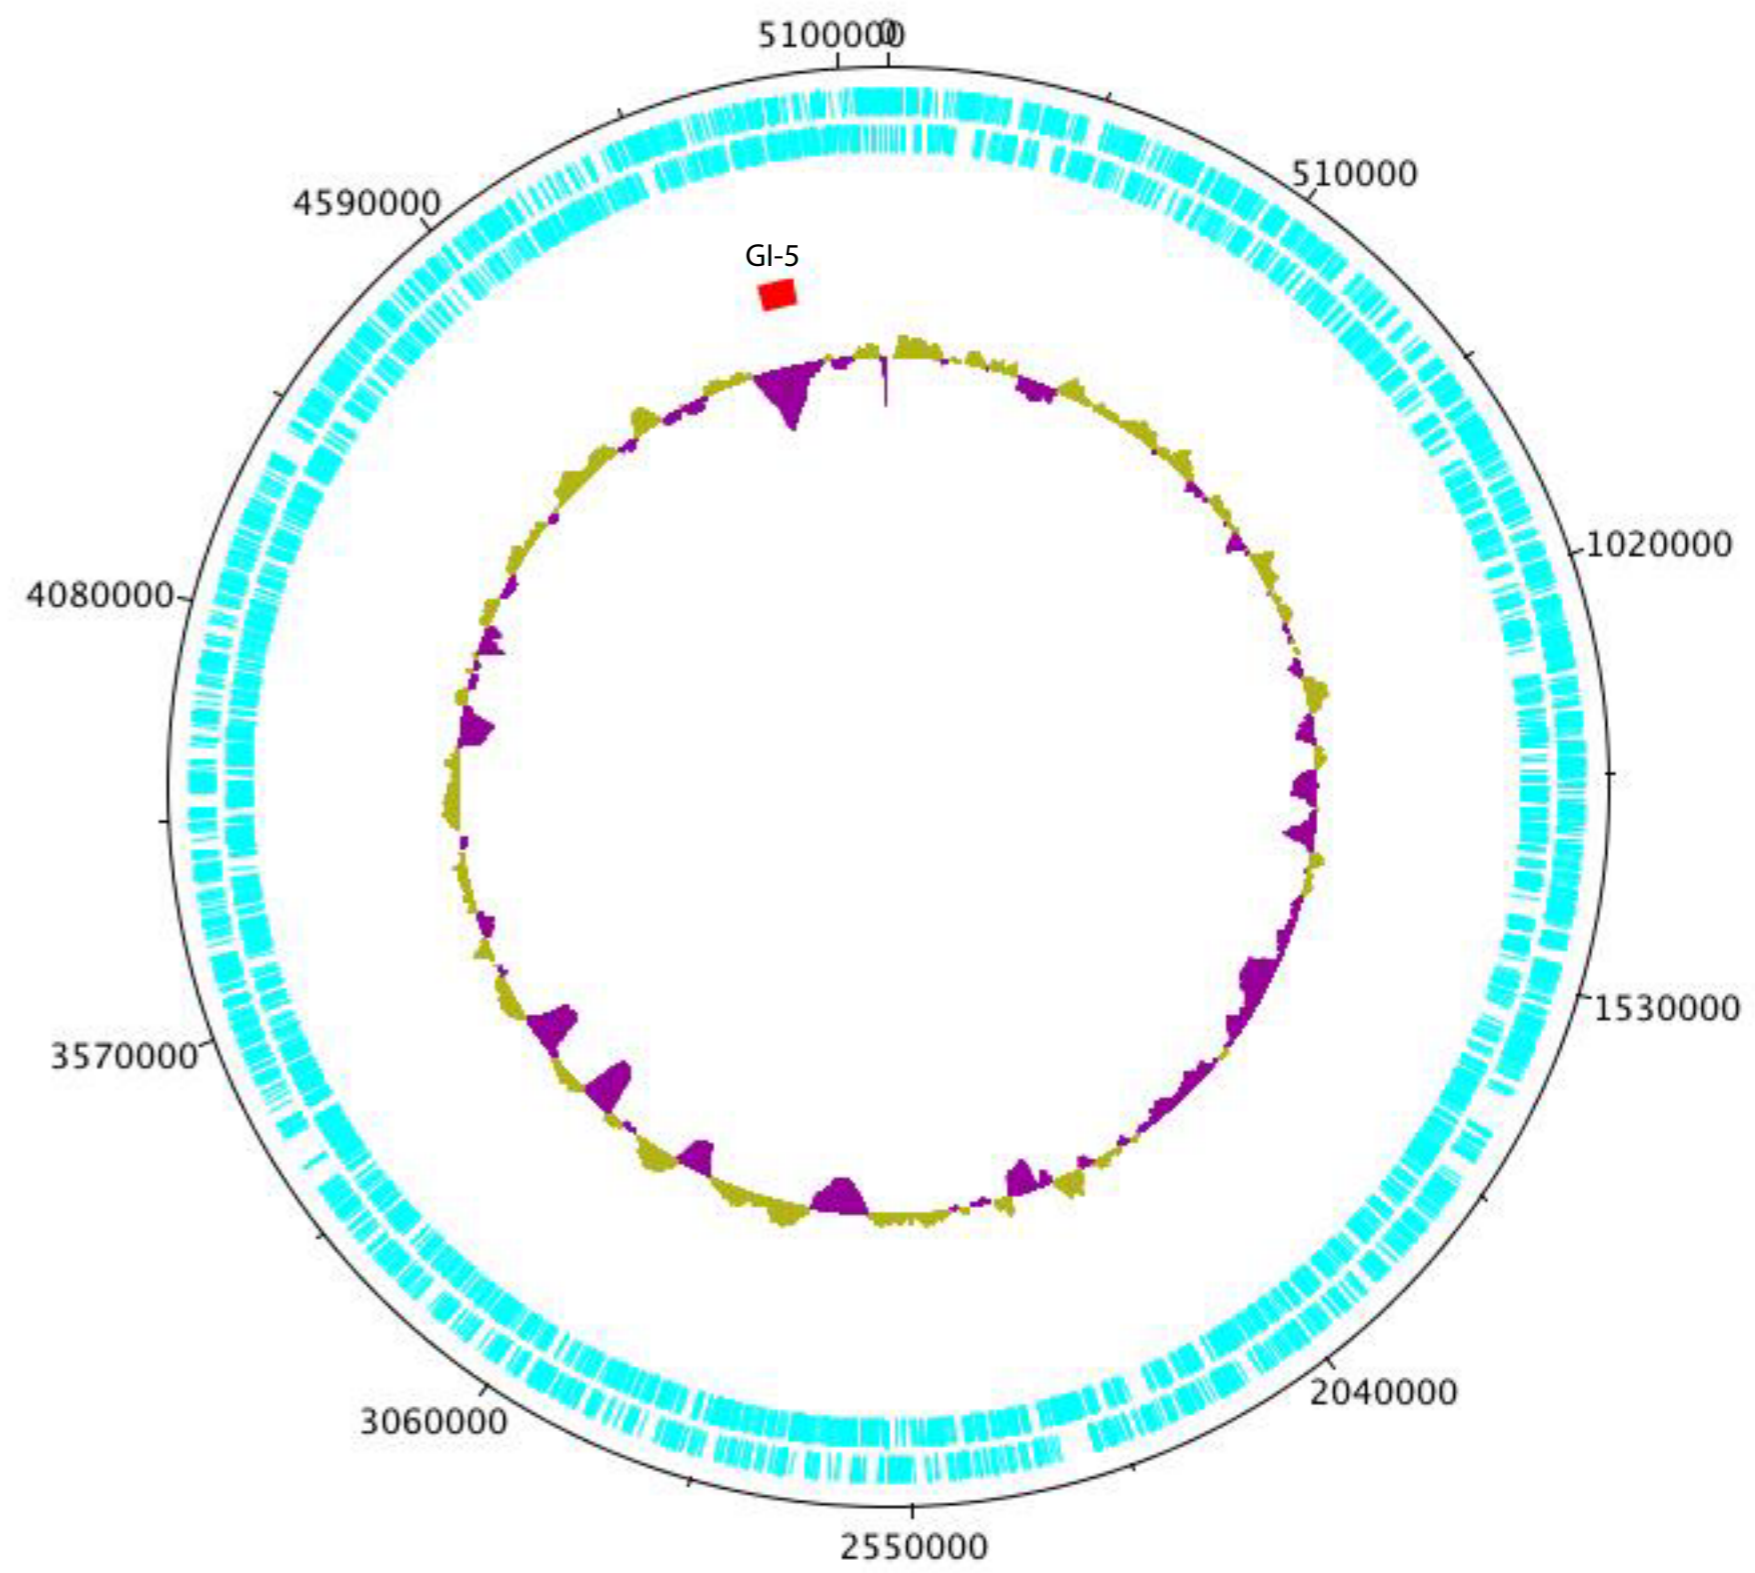

Supplement: mbo001131418so1.pdf [file mbo001131418so1.pdf]

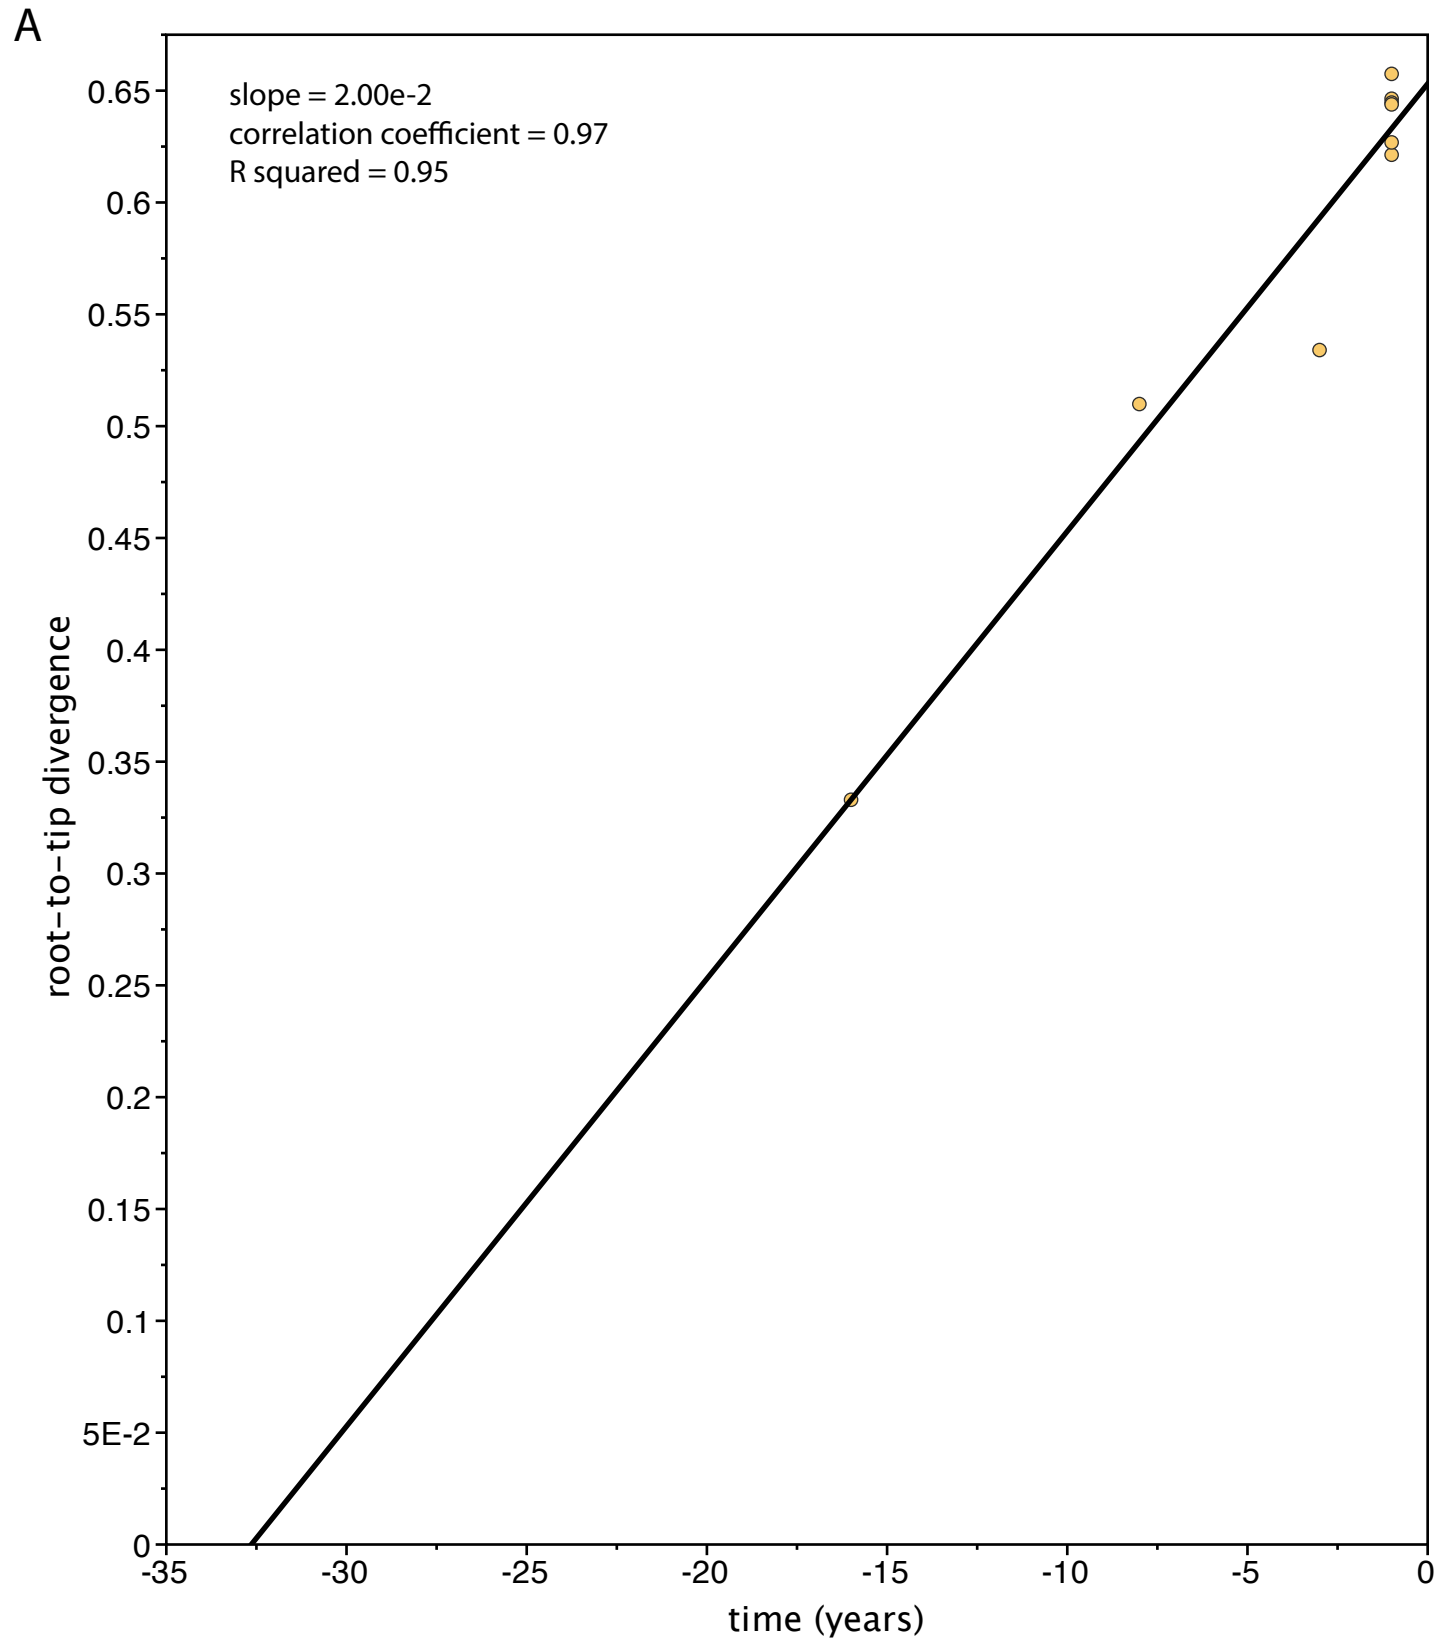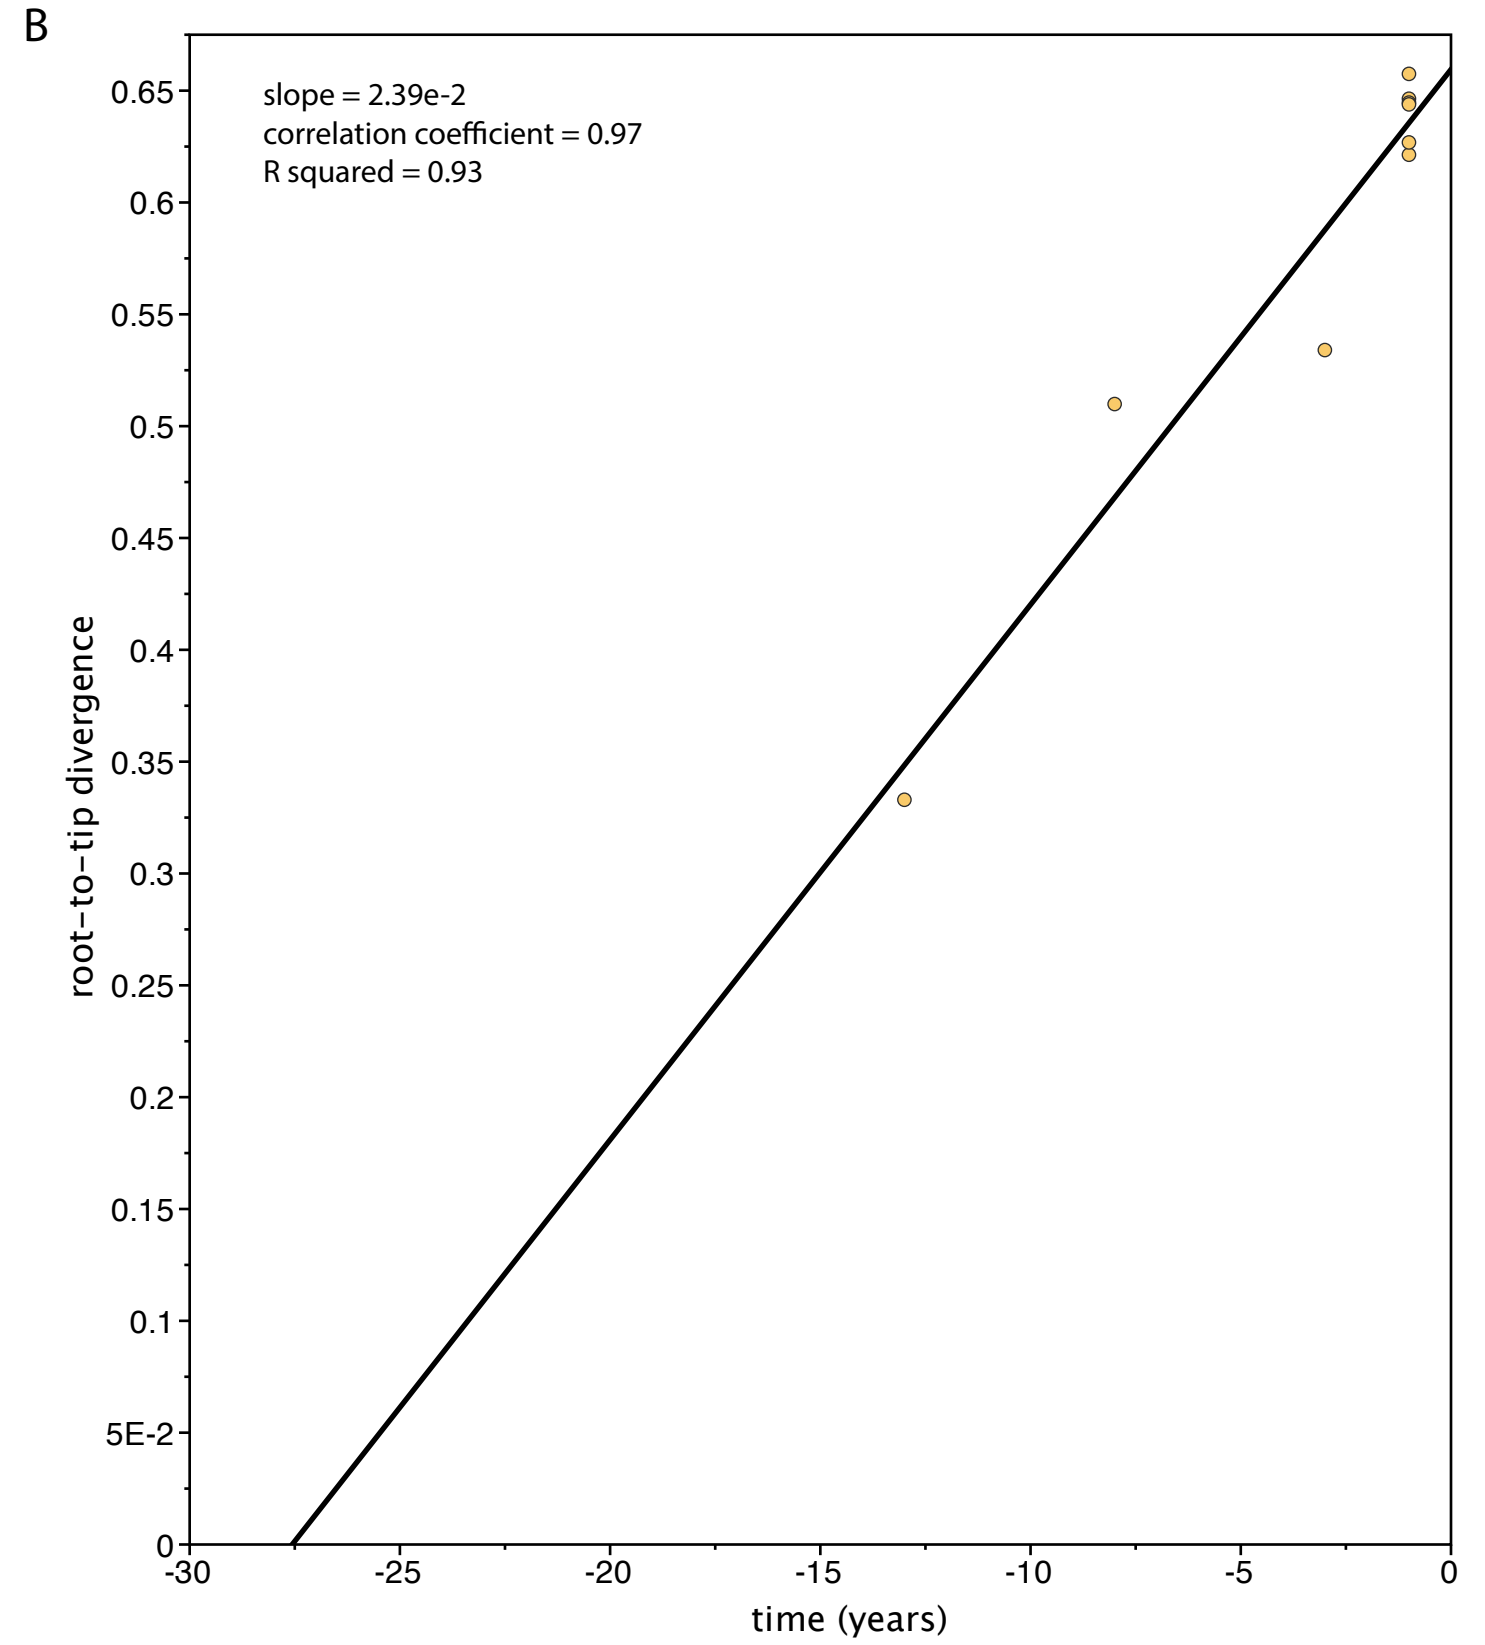

Supplement: mbo001131418so2.pdf [file mbo001131418so2.pdf]

A.

Ec12-0466

Ec11-9941

Ec11-9990

Ec11-9450

Ec04-8351

pHUSEC41\_1

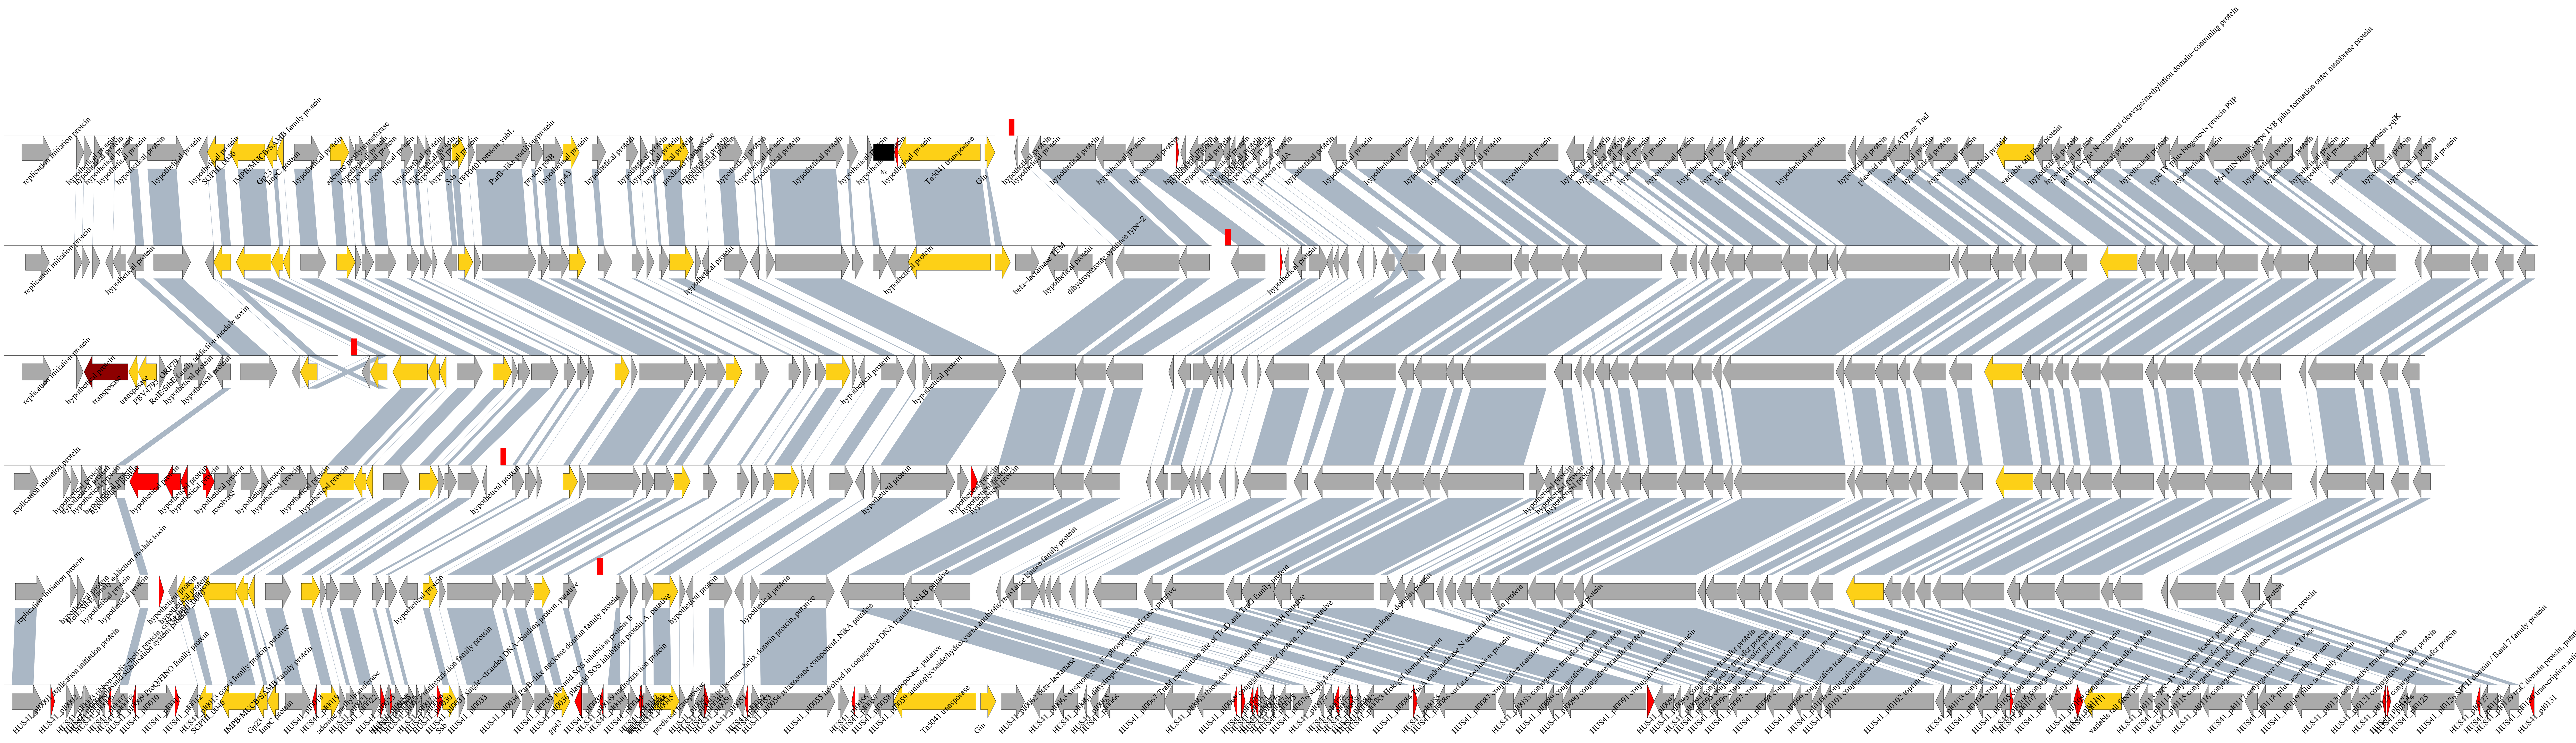

Plasmid pTY2



C.

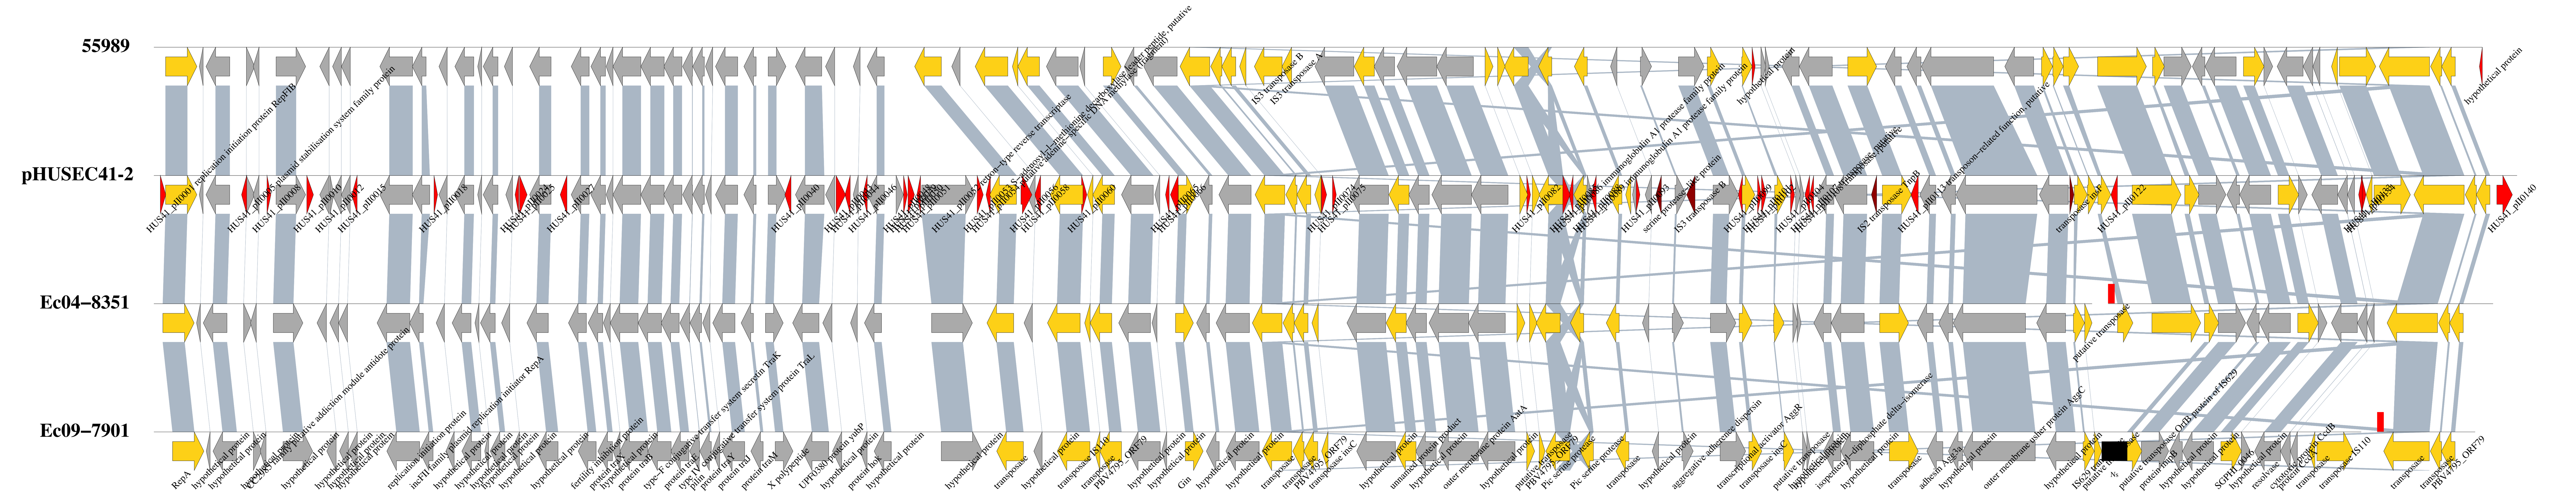

# Plasmid p55989 / pHUSEC41-2

Supplement: mbo001131418so6.pdf [file mbo001131418so6.pdf]
